# Supplementary material for: The Metabolomics of Childhood Atopic Diseases: A Comprehensive Pathway-Specific Review
Source: PubMed Central journal article supplement (PMC7767195; doi:10.3390/metabo10120511), 2020-12-16
Supplement: metabolites-10-00511-s001.pdf [file metabolites-10-00511-s001.pdf]

## Supplementary materials

**Table S1.** Characteristics of the 25 metabolomics studies conducted in children.

| Authors<br>Year<br>Country                      | Atopic focus<br>Age Group<br>Males, Total (%)  | Biospecimen<br>Method<br>Metabolomic<br>Profiling | Study Design<br>Population<br>Ethnicity             | No. of Cases                                                                                                                    | No. of Controls                                                                            | Diagnostic criteria                                                                  | Atopy                                                                                                                                                                                 | Use of Medication                                                                                                                           | Metabolomic Aim                                                                       |
|-------------------------------------------------|------------------------------------------------|---------------------------------------------------|-----------------------------------------------------|---------------------------------------------------------------------------------------------------------------------------------|--------------------------------------------------------------------------------------------|--------------------------------------------------------------------------------------|---------------------------------------------------------------------------------------------------------------------------------------------------------------------------------------|---------------------------------------------------------------------------------------------------------------------------------------------|---------------------------------------------------------------------------------------|
| Tao et al.[15]<br>2019<br>China                 | Asthma<br>6–11 years old<br>75 (69)            | Urine<br>GC-MS<br>Untargeted                      | Case-control<br>China<br>NR                         | 37 with uncontrolled<br>asthma<br>43 with controlled<br>asthma                                                                  | 29 sex-matched<br>healthy controls                                                         | PD, GINA guidelines                                                                  | Allergy: Mite allergy<br>was reported in 21<br>with uncontrolled<br>asthma and 26 with<br>controlled asthma. 8<br>cases were not tested.<br>No mite allergy in<br>controls.<br>AD: NR | 31 cases with uncontrolled<br>asthma and 37 cases with<br>controlled asthma used<br>inhaled corticosteroid (ICS)<br>in the previous 3 days. | Metabolomic profile<br>of asthma vs. healthy,<br>and of different<br>asthma endotypes |
| Park et al.[20]<br>2017<br>Korea and the<br>USA | Asthma<br>6–17 years old<br>21(70)             | Urine<br>LC-MS<br>Untargeted                      | Case-only<br>USA (Atlanta)<br>White/non-white: 6/24 | 30 with severe asthma:<br>15 corticosteroid (CS)-<br>respondent<br>15 CS-nonrespondent                                          | 0                                                                                          | PD                                                                                   | Allergy and AD: NR                                                                                                                                                                    | Children were treated with<br>a high-dose inhaled<br>corticosteroid and a second<br>controller medication                                   | Metabolomic profile<br>of CS-respondent vs.<br>CS-non-respondent<br>asthma            |
| Assfalg et<br>al.[36]<br>2012<br>Italy          | Atopic dermatitis<br>6–10 months old<br>17(53) | Urine<br>NMR<br>Untargeted                        | Case-control<br>Italy<br>NR                         | 20 with AD                                                                                                                      | 12 age-matched<br>healthy controls                                                         | PD according to the<br>United Kingdom<br>working party's<br>criteria                 | Allergic sensitization:<br>10 cases (50 %) with<br>positive SPT to cow<br>milk and/or egg<br>allergy. Controls: NR                                                                    | NR                                                                                                                                          | Metabolomic profile<br>of AD vs. healthy                                              |
| Chiu et al.[18]<br>2018<br>Taiwan               | Asthma, allergy<br>1–4 years old<br>22 (37)    | Urine<br>NMR<br>Untargeted                        | Nested case-control<br>Taiwan<br>NR                 | 30 diagnosed with<br>asthma at age 4 years.                                                                                     | 30 healthy children<br>without asthma or<br>other atopic<br>conditions                     | PD<br>Allergen-specific IgE:<br>sensitization was<br>defined as values<br>≥0.35 kU/L | Children with rhinitis<br>or eczema were<br>excluded.<br>Mite, food, and IgE<br>sensitization and total<br>IgE levels are<br>reported at age 3<br>years old.<br>AD: NR                | NR                                                                                                                                          | Identification of<br>metabolic<br>mechanisms<br>underlying asthma<br>development      |
| Mattarucchi et<br>al.[21]<br>2012<br>Italy      | Asthma<br>7–17 years old<br>33 (62)            | Urine<br>LC-MS<br>Untargeted                      | Case-control<br>Italy<br>All Caucasian              | 41 atopic asthmatics:<br>14 with well-controlled<br>symptoms without daily<br>controller drugs and 16<br>under daily controller | 12 age-matched<br>healthy controls with<br>no history of atopy or<br>respiratory diseases. | PD, GINA guidelines                                                                  | Allergy and AD: NR                                                                                                                                                                    | Well-controlled symptoms<br>with use of $\beta$ -2-agonist as<br>needed (n=14)<br>or use of at least one daily<br>controller drug (n=16).   | Metabolomic profile<br>of asthma vs. healthy,<br>and of different<br>asthma endotypes |

|                                             |                                                                       |                              |                                                                             |                                                                                                                                                      |                                                                                                 |                                                                                                                                                                     |                                                                                                                                                                                                                    |                                                                                                                        |                                                                                                                                         |
|---------------------------------------------|-----------------------------------------------------------------------|------------------------------|-----------------------------------------------------------------------------|------------------------------------------------------------------------------------------------------------------------------------------------------|-------------------------------------------------------------------------------------------------|---------------------------------------------------------------------------------------------------------------------------------------------------------------------|--------------------------------------------------------------------------------------------------------------------------------------------------------------------------------------------------------------------|------------------------------------------------------------------------------------------------------------------------|-----------------------------------------------------------------------------------------------------------------------------------------|
|                                             |                                                                       |                              |                                                                             | drugs.<br>11 with poorly controlled symptoms despite daily controller drugs and with at least two exacerbations requiring oral CS in the last year   |                                                                                                 |                                                                                                                                                                     |                                                                                                                                                                                                                    | Poorly controlled asthma with at least two daily controller drugs: (n=11)<br>AD: NR                                    |                                                                                                                                         |
| Papamichael et al.[22]<br>2019<br>Australia | Asthma<br>5–12 years old<br>NR                                        | Urine<br>GC-MS,<br>Targeted  | Case-only<br>Greece<br>NR                                                   | 65 with mild asthma                                                                                                                                  | 0                                                                                               | PD                                                                                                                                                                  | Allergy and AD: NR                                                                                                                                                                                                 | The majority were taking asthma medication during the past month                                                       | Investigate possible relationships between urinary organic acids and pulmonary diagnostic tests                                         |
| Saude et al.[24]<br>2011<br>Canada          | Asthma<br>4–16 years old<br>86 (64)                                   | Urine<br>NMR<br>Targeted     | Case-control<br>Canada<br>NR                                                | 73 with stable asthma, 20 with unstable asthma in the emergency department                                                                           | 42 age- and sex-matched healthy controls                                                        | PD<br>Cases were considered atopic on the basis of at least 1 positive SPT to a panel of common aeroallergens                                                       | Allergic sensitization: 73% of cases (n=68) were atopic: n=55 with stable asthma and n=13 with unstable asthma. NR for controls<br>AD: NR                                                                          | Use of ICS in n=51 with stable asthma and n=9 with unstable asthma                                                     | Metabolomic profile of asthma vs. healthy, and of different asthma endotypes                                                            |
| Turi et al.[33]<br>2019<br>USA              | Wheeze<br>Infants followed up at age 1, 2, and 3 years old<br>52 (37) | Urine<br>NMR<br>Untargeted   | Nested case-control<br>USA<br>White/Black/Hispanic/Other (%):<br>69/13/11/7 | 80: 70 with respiratory syncytial virus infection (RSV) and 10 with human rhinovirus (HRV)                                                           | 60 healthy controls                                                                             | Recurrent wheeze defined as ≥ 3 wheezing events in the last year, or wheeze with the use of asthma medications in the past year based on parental report            | Allergy and AD: NR                                                                                                                                                                                                 | NR                                                                                                                     | Metabolomic profile of RSV vs. HRV infection, and of who do and do not wheeze in early childhood after respiratory infection in infancy |
| Carraro et al.[19]<br>2018<br>Italy         | Wheeze/asthma<br>2–5 years old<br>NR                                  | Urine<br>LC-MS<br>Untargeted | Case-control<br>Italy<br>NR                                                 | 32 with recurrent wheezing. During the 3 years follow up: 16 were classified with transient wheezing, and 16 were classified with early-onset asthma | 13: with no history of allergic or respiratory diseases. No wheezing symptoms during follow up. | PD, GINA. Early-onset asthma was defined as an experience of recurrent asthma-like symptoms during the past year and use of daily ICS for at least 6 months.<br>SPT | Early-onset asthma group: 11 with allergic sensitization, 3 with FA, and 3 with AR.<br>Transient wheezing group: 4 with allergic sensitization, 1 with FA, and 0 with AR.<br>AD in 4 with early-onset asthma and 2 | Early-onset asthma: 5 used ICS and 3 used Montelukast.<br>Transient wheezing group: 3 used ICS and 2 used Montelukast. | Metabolomic profile of transient wheezing vs.early-onset asthma                                                                         |

|                                            |                                                                                                |                                              |                                       |                                                                                                                                                                                        |                                                                                                                               |                                                                                                                                                                                                                             |                                                                                                                                                                   |                                                                                                                                                           |                                                                                                                                   |
|--------------------------------------------|------------------------------------------------------------------------------------------------|----------------------------------------------|---------------------------------------|----------------------------------------------------------------------------------------------------------------------------------------------------------------------------------------|-------------------------------------------------------------------------------------------------------------------------------|-----------------------------------------------------------------------------------------------------------------------------------------------------------------------------------------------------------------------------|-------------------------------------------------------------------------------------------------------------------------------------------------------------------|-----------------------------------------------------------------------------------------------------------------------------------------------------------|-----------------------------------------------------------------------------------------------------------------------------------|
|                                            |                                                                                                |                                              |                                       |                                                                                                                                                                                        |                                                                                                                               |                                                                                                                                                                                                                             |                                                                                                                                                                   |                                                                                                                                                           | with transient wheezing group<br>Allergy and AD in controls: NR                                                                   |
| Chawes et al.[30]<br>2019<br>Denmark/Italy | Asthma<br>4 weeks–7 years old<br>NR                                                            | Urine<br>UPLC-MS<br>Untargeted               | Two cohorts (COPSAC)<br>Denmark<br>NR | 20 and 49 in the two cohorts respectively developed wheeze/asthma during the first 6 years of life                                                                                     | 151 and 112 healthy children in the two cohorts, respectively, did not develop wheeze/asthma during the first 6 years of life | PD. Persistent wheeze (0–3 y)/asthma (>3 y) was diagnosed based on a validated quantitative symptom-based algorithm.                                                                                                        | Allergy and AD: NR                                                                                                                                                | No use of medication before urinary samples were collected                                                                                                | Development of persistent wheeze/asthma in the first 6 years of life in children born to mothers with asthma                      |
| Barlotta et al.[32]<br>2019<br>Italy       | Wheeze<br><1 year old.<br>Follow up until 2 years after an episode of bronchiolitis<br>49 (64) | Urine<br>LC-MS<br>Untargeted                 | Nested case-control<br>Italy<br>NR    | Of 52 infants with bronchiolitis, 17 developed recurrent wheezing, 11 experienced 1 or 2 episodes of wheezing, and 24 did experience wheezing episodes during the 2 years of follow up | 24 healthy infants with no history of bronchiolitis < 1 year                                                                  | PD. Recurrent wheezing was defined as ≥3 episodes of                                                                                                                                                                        | Allergy: NR<br>AD: in 11 cases (21%): 4 with no wheezing, 6 with recurrent wheezing, 1 with 1 of 2 wheezing episodes.<br>NR for controls                          | NR                                                                                                                                                        | Metabolomic profile of infants with acute bronchiolitis who will subsequently develop recurrent wheezing from those who will not. |
| Arrieta et al.[35]<br>2015<br>Canada       | Wheeze, allergy,<br>3–12 months old<br>21 (60)                                                 | Urine<br>UPLC-MS<br>and GC-MS,<br>Untargeted | Nested case-control<br>Canada<br>NR   | 19 with wheeze and allergy                                                                                                                                                             | 16 healthy controls                                                                                                           | Wheeze and AD are either diagnosed by clinicians or non-clinicians by questionnaire during the first year of life. SPT: classified as atopic if the development of a wheal ≥2 mm for any of 10 specific allergens occurred. | Allergic sensitization:<br>All cases were atopic. AD: 3 cases (16%) and 1 control (6%) at age 3 months and 11 cases (58%) and 8 controls (50%) at age 1 year old. | 8 cases (48%) and 1 control (6%) used antibiotics during the first year of life.                                                                          | Metabolic profile of infants with wheeze and allergy vs. healthy infants                                                          |
| Quan-Jun et al.[23]<br>2017<br>China       | Asthma<br>1–12 years old<br>56 (48)                                                            | Urine and serum<br>NMR<br>Untargeted         | Case-control<br>China<br>NR           | 69 inpatient children with asthma during acute exacerbation without the usage of any topical or systemic CS or β-2-agonist treatment in the previous 3 months                          | 48 age- and sex-matched asthmatic controls with the usage of asthma medication.                                               | PD                                                                                                                                                                                                                          | Allergy and AD: NR                                                                                                                                                | During the study, a total of 37, 31, and 47 cases used procaterol, montelukast, and antibiotics, respectively. 31 controls were treated with antibiotics. | Metabolomic profile of combined treatment with ICS and β-2-agonist of children with asthma during acute exacerbation              |

|                                          |                                             |                                                       |                                                                  |                                                                                    |                                                     |                                                                                                                                                                                                                                                                                                                 |                                                                                                                                                                                                                    |                                                                                                                                                                                    |                                                                                                                                        |
|------------------------------------------|---------------------------------------------|-------------------------------------------------------|------------------------------------------------------------------|------------------------------------------------------------------------------------|-----------------------------------------------------|-----------------------------------------------------------------------------------------------------------------------------------------------------------------------------------------------------------------------------------------------------------------------------------------------------------------|--------------------------------------------------------------------------------------------------------------------------------------------------------------------------------------------------------------------|------------------------------------------------------------------------------------------------------------------------------------------------------------------------------------|----------------------------------------------------------------------------------------------------------------------------------------|
| Chiu et al.[38]<br>2020<br>Taiwan        | Asthma, allergy<br>3–5 years old<br>35 (65) | Urine and<br>plasma<br>NMR<br>Untargeted              | Case-control<br>NR<br>NR                                         | 28 with asthma                                                                     | 26 healthy children<br>without atopic<br>conditions | PD: based on the<br>guidelines of the<br>Global Initiative for<br>Asthma.<br>Serum total IgE.<br>Allergic sensitization<br>is defined as allergen-<br>specific IgE levels $\geq$<br>0.35 kU/L to any of<br>the 4 allergens.                                                                                     | Allergic sensitization:<br>Mite allergy: 19 cases<br>(68%) and 5 controls<br>(19%).<br>Food allergy: 15 cases<br>(54%) and 7 controls<br>(27%)<br>IgE>100 kU/L: 14<br>cases (50%) and 2<br>controls (8%)<br>AD: NR | NR                                                                                                                                                                                 | Metabolomic profile<br>of asthma vs. healthy<br>and children with<br>mite, food, and IgE<br>sensitization vs.<br>without sensitization |
| Kelly et al.[25]<br>2018<br>USA          | Asthma<br>6 to 14 years<br>190 (59)         | Plasma<br>LC-MS<br>Untargeted                         | Case-only<br>Costa Rica<br>All Hispanic/Latino                   | 325 with mild-to-<br>moderate asthma                                               | 0                                                   | PD: $\geq$ 2 episodes of<br>respiratory symptoms<br>or asthma attacks in<br>the prior year.                                                                                                                                                                                                                     | Allergy and AD: NR                                                                                                                                                                                                 | 297 (91,4 %) used controller<br>treatment: either oral or<br>inhaled steroids,<br>prednisone, long-acting<br>inhaled $\beta$ 2-agonists, or<br>leukotriene<br>inhibitors/modifiers | Identify metabolites<br>associated with<br>asthmatic lung<br>function                                                                  |
| Kelly et al.[26]<br>2018<br>USA          | Asthma<br>6-10 years old<br>113 (48)        | Plasma<br>UPLC-MS<br>and /or GC-<br>MS,<br>Untargeted | Nested case-control<br>USA<br>White/Black/Ot-her (%)<br>57/24/19 | 46 with current asthma                                                             | 191 without asthma                                  | Maternal report of<br>ever diagnosed with<br>asthma by a<br>healthcare<br>professional and<br>either taking asthma<br>medications or<br>experienced wheezing<br>symptoms in the past<br>year.<br>Allergen sensitization<br>was defined as any<br>specific IgE level $\geq$<br>0.35 IU/ml to common<br>allergens | Allergen sensitization:<br>215 of 237 were tested.<br>Sensitization to any<br>common allergen was<br>found in 28 cases<br>(61%)<br>and in 86 controls<br>(45%)<br>AD: NR                                           | The majority (80%) of<br>children with current<br>asthma were taking ICS.                                                                                                          | Metabolomic profiles<br>of asthma vs. healthy                                                                                          |
| Kelly et al.[27]<br>2017<br>USA          | Asthma<br>6-14 years old<br>226 (60)        | Plasma<br>LC-MS<br>Untargeted                         | Case-only<br>Costa Rica<br>All Hispanic                          | 380: The majority of<br>children were defined as<br>mild to moderate<br>asthmatics | 0                                                   | PD: $\geq$ 2 respiratory<br>symptoms or asthma<br>attacks in the prior<br>year.                                                                                                                                                                                                                                 | Allergy and AD: NR                                                                                                                                                                                                 | 346 (91%) were on some<br>form (inhaled or oral) of<br>regular controller treatment                                                                                                | Metabolomic profile<br>of asthmatic children<br>by their degree of<br>lung function                                                    |
| Fitzpatrick et<br>al.[28]<br>2014<br>USA | Asthma<br>6-17 years old<br>35 (61)         | Plasma<br>LC-MS<br>Untargeted                         | Case-only<br>USA (Atlanta)<br>Nonwhite: 48 (84%)                 | 22 with mild to<br>moderate asthma                                                 | 0                                                   | PD. Total serum IgE.                                                                                                                                                                                                                                                                                            | AR: 91% of mild-to-<br>moderate asthma<br>(n=20) and 100% of                                                                                                                                                       | Severe refractory asthma:<br>use of high-dose ICS and<br>long-acting $\beta$ -2-agonist.                                                                                           | Metabolomic profile<br>of mild to moderate                                                                                             |

|                               |                                                                             |                                      |                                                                                              |                                                                                                                |                                                                   |  |                                                                                                                                                                  |                                                                                                                                                                                                         |                                                                                                                                         |                                                                                        |
|-------------------------------|-----------------------------------------------------------------------------|--------------------------------------|----------------------------------------------------------------------------------------------|----------------------------------------------------------------------------------------------------------------|-------------------------------------------------------------------|--|------------------------------------------------------------------------------------------------------------------------------------------------------------------|---------------------------------------------------------------------------------------------------------------------------------------------------------------------------------------------------------|-----------------------------------------------------------------------------------------------------------------------------------------|----------------------------------------------------------------------------------------|
|                               |                                                                             |                                      |                                                                                              | 35 with severe refractory asthma                                                                               |                                                                   |  |                                                                                                                                                                  | severe refractory asthma (n=35). AD: 50% of mild-to-moderate asthma (n=11) and 60% of severe refractory asthma (n=21)                                                                                   | Mild-to-moderate asthma: use of ICS or ICS/long-acting $\beta$ -2-agonist combination therapy.                                          | asthma vs. severe refractory asthma                                                    |
| McGeachie et al.[14] 2015 USA | Wheeze, asthma 1-18 years old 13 (65)                                       | Plasma LC-MS Targeted                | Case-only USA 100 % self-reported European ancestry                                          | 8 with use of $\beta$ -2-agonist and 12 with no use of $\beta$ -2-agonist in the week preceding blood is drawn | 0                                                                 |  | PD. Self-reported use of $\beta$ -2-agonist inhalers in the week preceding blood drawn.                                                                          | AR: 7 with use of $\beta$ -2-agonist (88%) and 6 without (50%)<br>FA: 2 with use of $\beta$ -2-agonist (25%) and 4 without (33%).<br>Eczema: 5 with use of $\beta$ -2-agonist (63%) and 5 without (42%) | Use of ICS in the past week: 50% in the children who used $\beta$ -2-agonist (n=4) and 42 % in the group who did not (n=5)              | Metabolic profile of asthmatics with use of $\beta$ -2-agonist vs. without             |
| Checkley et al.[29] 2016 USA  | Asthma 9-19 years old 57 (57)                                               | Serum LC-MS Targeted                 | Nested case-control Peru NR                                                                  | 50 with current asthma                                                                                         | 49 with no prior history of asthma and with normal lung function. |  | PD or self- or parental-report of wheezing or use of asthma medications in the past year. Atopy: the presence of IgE antibodies to any of three allergen panels. | Allergic sensitization: 42 cases and 27 controls AD: NR                                                                                                                                                 | 4 out of 48 used ICS, and 12 out of 48 used $\beta$ -2-agonist in the prior year. Data is missing in 2 cases.                           | Metabolic profile of asthma vs. healthy.                                               |
| Huang et al.[37] 2014 China   | Atopic dermatitis 3 months-3 years old 40 (62)                              | Serum LC-MS, Untargeted and targeted | Case-control China NR                                                                        | 19 AD patients with high IgE levels<br>23 AD patients with normal IgE levels                                   | 23                                                                |  | AD was diagnosed according to Hanifin and Rajka diagnostic criteria.                                                                                             | Controls: all with normal IgE levels                                                                                                                                                                    | NR                                                                                                                                      | Metabolic profile of AD vs. healthy and of children with AD high vs. normal IgE levels |
| Crestani et al.[16] 2019 USA  | Asthma, allergy 1-12 years old (cases). Controls up to 18 years old 70 (56) | Serum UPLC-MS Untargeted             | Case-control USA White/Hispanic/ African American/Asian/Other or not available: 51/33/27/5/9 | 35 with asthma: intermittent, mild persistent or moderate persistent 35 with FA<br>35 with both asthma and FA  | 20 controls without AD or FA                                      |  | Asthma diagnosis was based on a validated questionnaire and American Thoracic Society criteria. The diagnosis of FA was made by the                              | AR: in 27 with asthma (77%), in 23 with FA (67%), and in 30 with both asthma and FA (86%).<br>AD: in 8 with asthma (23%), in 21 with FA (60%), and in 20 with                                           | NR. However, exclusion criteria were use of steroids, immunosuppressive medications, and use of antibiotics within the previous 6 weeks | Metabolomic profile of asthma vs. healthy and of FA with/without asthma vs. healthy.   |

|                                      |                                                      |                                                   |                                                                          |                                                                   |                                                                            |                                                                                                                                        |                                                                                                                                                                                                     |                                                                                                      |                                                                                                           |
|--------------------------------------|------------------------------------------------------|---------------------------------------------------|--------------------------------------------------------------------------|-------------------------------------------------------------------|----------------------------------------------------------------------------|----------------------------------------------------------------------------------------------------------------------------------------|-----------------------------------------------------------------------------------------------------------------------------------------------------------------------------------------------------|------------------------------------------------------------------------------------------------------|-----------------------------------------------------------------------------------------------------------|
|                                      |                                                      |                                                   |                                                                          |                                                                   |                                                                            | treating physician and was based on a combination of positive IgE test results (SPT, specific IgE, or both)                            | both asthma and FA (57%).                                                                                                                                                                           |                                                                                                      |                                                                                                           |
| Chiu et al.[17]<br>2019<br>Taiwan    | Asthma, allergy<br>4-7 years old<br>50 (59)          | Stool<br>NMR<br>Untargeted                        | Case-control<br>Taiwan<br>100 % same ethnic and geographical region      | 34 with asthma<br>27 with rhinitis                                | 24 healthy controls without a history of asthma or other atopic conditions | PD<br>Allergen-specific IgE, kU/L to mite, egg white, and cow milk. Total fecal and total serum IgE kU/L                               | Allergic sensitization: Mean values of allergic sensitization to mite, egg white, and cow milk, and total fecal IgE level and total serum IgE level are reported in the original article.<br>AD: NR | NR. But no probiotics or antibiotics therapy for at least 4 weeks before the sampling.               | Metabolomic profile of rhinitis vs. asthma and compared to healthy controls.                              |
| Lee-Sarwar et al.[31]<br>2019<br>USA | Asthma<br>3 years old<br>203 (56)                    | Stool<br>MS<br>Untargeted                         | Nested case-control<br>NR<br>Black/White/Hispanic or other (%): 45/20/36 | 85 with asthma                                                    | 276 without asthma                                                         | Parental report of a physician's diagnosis of asthma in the child's first 3 years of life                                              | Allergic sensitization: in 49 with asthma (58%) and in 96 controls (35%). Eczema in 38 with asthma (45%) and in 62 controls (22%)                                                                   | Recent use of ICS and/or systemic CS in the prior 3 months: 25 with asthma (29%) and 6 controls (2%) | Metabolomic profile of asthma vs. healthy                                                                 |
| Carraro et al.[34]<br>2018<br>Italy  | Wheeze<br>Unborn, follow up at age 1 year<br>76 (53) | Amniotic fluid<br>LC-MS and LC-MSE,<br>Untargeted | Nested case-control<br>The Netherlands<br>NR                             | 86 experienced at least 1 episode of wheezing in their first year | 56 with no history of wheezing in their first year                         | Parental report at age 1 year: Parents were asked to record their children's respiratory symptoms (including wheezing) in a daily log. | Allergy: NR. But atopic parents: n=46 in the wheezing group and n=35 in the control group<br>AD: NR                                                                                                 | NR                                                                                                   | Identify metabolites at birth associated with subsequent onset of wheezing during the first year of life. |

Abbreviations: MS: mass spectrometry; LC: liquid chromatography; GC: gas chromatography; NMR: nuclear magnetic resonance; UPLC: Ultra performance liquid chromatography GINA: Global Initiative for Asthma; CS: corticosteroid; ICS: inhaled corticosteroid; NR: not reported; AD: atopic dermatitis; PD: physician-diagnosed; SPT; skin prick test; FA: food allergy; AR: allergic rhinitis; IgE: Immunoglobulin E; RSV: respiratory syncytial virus; HRV: human rhinovirus.

**Table S2.** PubMed database search.

A systematic search string was conducted by a combination of blocks of identified keywords and MeSH terms related to 'atopy' (asthma, allergy or atopic dermatitis), 'metabolomics' and 'children': *"Asthma" OR "Allergy" OR "Atopic dermatitis" AND "Metabolomics" AND "Children"*.

|                            | MeSH terms                                           | Keywords in "Title/Abstract"                                                                                                                                                               |                                                                                                                                                                                     |                                                     |
|----------------------------|------------------------------------------------------|--------------------------------------------------------------------------------------------------------------------------------------------------------------------------------------------|-------------------------------------------------------------------------------------------------------------------------------------------------------------------------------------|-----------------------------------------------------|
| <i>"Asthma"</i>            | Asthma<br>Bronchitis<br>Respiratory Sounds/diagnosis | asthma<br>bronchitis<br>wheez*                                                                                                                                                             |                                                                                                                                                                                     |                                                     |
| <i>"Allergy"</i>           | Rhinitis, Allergic<br>Food hypersensitivity          | "allergic rhinitis"<br>allergy<br>allergic                                                                                                                                                 | atopy<br>"allergic sensitization"<br>"food allergy"                                                                                                                                 |                                                     |
| <i>"Atopic dermatitis"</i> | Dermatitis, Atopic                                   | "atopic dermatitis"<br>"atopic eczema"<br>atopy                                                                                                                                            |                                                                                                                                                                                     |                                                     |
| <i>"Metabolomics"</i>      | Metabolome<br>Metabolomics                           | metabolome<br>metabolite fingerprint *<br>metabolite phenotyp *<br>metabolite signatur *<br>metabolite profil *<br>metabolomics profil *<br>metabolomic *<br>breathomic *<br>metabonomic * | metabolomic profil *<br>metabolomics signatur *<br>metabolomic signatur *<br>metabolomics phenotyp *<br>metabolomic fingerprint *<br>metabolomic *<br>breathomic *<br>metabonomic * | metabolomic phenotyp *<br>metabolomics fingerprints |
| <i>"Children"</i>          | Infant<br>Adolescent<br>Child                        | youth<br>juvenile<br>newborn<br>young<br>youngster                                                                                                                                         | teen<br>baby<br>babies<br>kid*<br>child                                                                                                                                             | infant<br>adolescent<br>preschool<br>children       |
